# Supplementary material for: In vitro apoptosis-inducing effect and gene expression profiles of mixed ligand Cu(ii) complexes derived from 4-acyl pyrazolones on human lung cancer cells
Source: Royal Society of Chemistry journal article supplement (doi:10.1039/c7ra01025g), 2017-01-01
Supplement: c7ra01025g1.pdf [file c7ra01025g1.pdf]

### Supplementary Material

Table S1. Selected bond lengths and angles of the complexes

| 1                                                   |            | 3          |            | 4           |            |
|-----------------------------------------------------|------------|------------|------------|-------------|------------|
| <b>Bond distances (Å) with esd's in parentheses</b> |            |            |            |             |            |
| Cu1 O10                                             | 1.946(2)   | O1 Cu1     | 1.9274(16) | Cu17 O6     | 1.9269(16) |
| Cu1 O17                                             | 1.942(3)   | O2 C1      | 1.274(3)   | Cu17 O4     | 1.9268(17) |
| Cu1 N9                                              | 2.012(3)   | O2 Cu1     | 1.9214(16) | Cu17 N2     | 1.989(2)   |
| Cu1 N2                                              | 2.001(3)   | N4 C23     | 1.318(3)   | Cu17 N3     | 1.999(2)   |
| Cu1 O31                                             | 2.299(3)   | N4 Cu1     | 2.004(2)   | Cu17 O8     | 2.327(2)   |
| O10 C11                                             | 1.283(4)   | N3 Cu1     | 2.0026(19) | O6 C19      | 1.274(3)   |
| O17 C16                                             | 1.263(4)   | N2 N1      | 1.398(3)   | O4 C15      | 1.270(3)   |
| N9 C8                                               | 1.351(5)   | O6 Cu1     | 2.303(2)   | N2 C31      | 1.344(3)   |
| N9 C25                                              | 1.317(5)   | N5 O5      | 1.229(3)   | N2 C27      | 1.344(3)   |
| N2 C3                                               | 1.363(4)   | N5 O7      | 1.229(3)   | N7 C13      | 1.314(3)   |
| N2 C28                                              | 1.331(5)   | O6 N5      | 1.258(3)   | N7 N11      | 1.395(3)   |
| O34 N32                                             | 1.211(4)   | N2 C1      | 1.356(3)   | N12 O8      | 1.248(3)   |
| O31 N32                                             | 1.209(4)   | N2 C16     | 1.424(3)   | N12 O1      | 1.235(3)   |
| N32 O5                                              | 1.158(6)   | N1 C3      | 1.298(3)   | N12 O7      | 1.234(3)   |
| <b>Bond angles(Å)with esd's in parentheses</b>      |            |            |            |             |            |
| O17 Cu1 O10                                         | 96.83(10)  | C5 O1 Cu1  | 128.02(15) | O6 Cu17 O4  | 94.13(7)   |
| N9 Cu1 O10                                          | 166.62(11) | C1 O2 Cu1  | 120.76(15) | O6 Cu17 N2  | 173.11(8)  |
| N9 Cu1 O17                                          | 89.40(11)  | C23 N4 C27 | 118.1(2)   | O6 Cu17 N3  | 93.74(8)   |
| N2 Cu1 O10                                          | 90.68(10)  | C23 N4 Cu1 | 129.47(18) | O6 Cu17 O8  | 89.37(7)   |
| N2 Cu1 O17                                          | 170.72(11) | C27 N4 Cu1 | 112.24(16) | O4 Cu17 N2  | 90.03(7)   |
| N2 Cu1 N9                                           | 82.15(12)  | C28 N3 Cu1 | 112.23(16) | O4 Cu17 N3  | 168.45(8)  |
| O31 Cu1 O10                                         | 92.48(10)  | C29 N3 C28 | 118.1(2)   | O4 Cu17 O8  | 88.52(8)   |
| O31 Cu1 O17                                         | 94.04(13)  | C29 N3 Cu1 | 129.56(19) | N2 Cu17 N3  | 81.36(8)   |
| O31 Cu1 N9                                          | 98.91(12)  | N1 N2 C16  | 119.0(2)   | N2 Cu17 O8  | 96.23(8)   |
| O31 Cu1 N2                                          | 91.07(13)  | C1 N2 N1   | 111.3(2)   | N3 Cu17 O8  | 100.01(8)  |
| C11 O10 Cu1                                         | 119.1(2)   | O1 Cu1 N4  | 90.17(8)   | C19 O6 Cu17 | 120.55(15) |
| C16 O17 Cu1                                         | 124.3(2)   | O1 Cu1 N3  | 170.39(8)  | C15 O4 Cu17 | 128.13(16) |
| C8 N9 Cu1                                           | 111.8(2)   | O1 Cu1 O6  | 88.83(9)   | C31 N2 Cu17 | 126.18(16) |
| C25 N9 Cu1                                          | 129.1(3)   | O2 Cu1 O1  | 94.64(7)   | O1 N12 O8   | 119.4(2)   |
| C3 N2 Cu1                                           | 112.7(2)   | O2 Cu1 N4  | 170.46(8)  | O7 N12 O8   | 120.4(3)   |
| C28 N2 Cu1                                          | 129.8(2)   | O2 Cu1 N3  | 92.05(8)   | O7 N12 O1   | 120.2(3)   |
| N32 O31 Cu1                                         | 120.6(3)   | O2 Cu1 O6  | 89.38(8)   | N12 O8 Cu17 | 123.05(17) |
| C14 N13 N33                                         | 106.5(3)   | N4 Cu1 O6  | 98.97(8)   | N11 C19 C8  | 105.64(19) |
| O31 N32 O34                                         | 124.6(4)   | N3 Cu1 N4  | 82.25(8)   | O4 C15 C8   | 122.3(2)   |
| O5 N32 O34                                          | 118.9(4)   | N3 Cu1 O6  | 98.15(9)   | N2 C31 C30  | 122.2(2)   |
| O5 N32 O31                                          | 116.2(4)   | O5 N5 O7   | 120.9(3)   | N3 C26 C27  | 115.1(2)   |

**Table S2. Analysis of Short Ring-Interactions with Cg-Cg distances < 6.0 Angstrom and Beta < 60.0 Deg. for complexes 1 & 4.**

| <b>Cg(I) Res(I)Cg(J)</b> | <b>[ARU(J)]</b>     | <b>Cg-Cg</b> | <b>Alpha</b> | <b>Beta</b> | <b>Gamma</b> | <b>CgI_perp</b> | <b>CgJ_perp</b> |
|--------------------------|---------------------|--------------|--------------|-------------|--------------|-----------------|-----------------|
| <b>Complex-1</b>         |                     |              |              |             |              |                 |                 |
| Cg(1) -> Cg(2)           | [-1+X,Y,Z]          | 4.8061(20)   | 15.59        | 47.46       | 34.98        | 3.938           | 3.249           |
| Cg(1) -> Cg(7)           | [-1+X,Y,Z]          | 4.4230(22)   | 12.85        | 40.05       | 29.92        | 3.834           | 3.386           |
| Cg(2) -> Cg(6)           | [1+X,Y,Z]           | 4.2423(22)   | 12.50        | 35.81       | 37.03        | 3.387           | 3.440           |
| Cg(2) -> Cg(7)           | [1-X,-Y,-Z]         | 3.6874(23)   | 3.75         | 24.58       | 28.30        | 3.247           | 3.353           |
| Cg(3) -> Cg(5)           | [1+X,Y,Z]           | 4.5309(19)   | 9.34         | 39.42       | 48.75        | 2.987           | 3.500           |
| Cg(3) -> Cg(6)           | [1+X,Y,Z]           | 4.9640(19)   | 10.21        | 46.18       | 53.53        | 2.951           | 3.437           |
| Cg(3) -> Cg(7)           | [1-X,-Y,-Z]         | 3.4441(22)   | 3.53         | 12.34       | 13.57        | 3.348           | 3.365           |
| Cg(4) -> Cg(7)           | [-1+X,Y,Z]          | 3.7968(24)   | 10.51        | 24.49       | 15.24        | 3.663           | 3.455           |
| Cg(5) -> Cg(2)           | [-1+X,Y,Z]          | 3.6216(22)   | 11.58        | 20.51       | 9.13         | 3.576           | 3.392           |
| Cg(6) -> Cg(7)           | [-1+X,Y,Z]          | 3.7205(23)   | 9.89         | 21.74       | 23.18        | 3.420           | 3.456           |
| <b>Complex-4</b>         |                     |              |              |             |              |                 |                 |
| Cg(1) -> Cg(8)           | [1-X,-Y,1-Z]        | 4.1501(15)   | 11.60        | 32.72       | 43.27        | 3.022           | 3.491           |
| Cg(2) -> Cg(5)           | [1-X,-Y,1-Z]        | 4.4596(16)   | 11.50        | 38.30       | 49.78        | 2.880           | 3.500           |
| Cg(4) -> Cg(5)           | [1/2-X,1/2+Y,1/2-Z] | 4.5561(17)   | 16.96        | 49.94       | 33.34        | 3.806           | 2.933           |

**Table S3. Analysis of X-H...Cg(Pi-Ring) Interactions (H..Cg < 3.4 Ang. - Gamma < 30.0 Deg) for complexes 1 & 4**

| <b>X--H(I) Res(I) Cg(J)</b> | <b>[ARU(J)]</b>      | <b>H..Cg</b> | <b>X-H..Cg</b> | <b>X..Cg</b> |
|-----------------------------|----------------------|--------------|----------------|--------------|
| <b>Complex-1</b>            |                      |              |                |              |
| C(22)-H(22) [1] -> Cg(6)    | [1-X,-1/2+Y,1/2-Z]   | 3.0299       | 158.37         | 3.9095(50)   |
| C(27)-H(27) [1]-> Cg(3)     | [-1+X,Y,Z]           | 3.2055       | 108.83         | 3.6145(39)   |
| <b>Complex-4</b>            |                      |              |                |              |
| C(1)-H(1)-> Cg(8)           | [3/2-X,1/2+Y,1/2-Z]  | 3.3401       | 127.44         | 3.9748(33)   |
| C(11)-H(11)-> Cg(2)         | [ 3/2-X,1/2+Y,1/2-Z] | 2.8120       | 159.90         | 3.6990(38)   |
| C(25)-H(25)-> Cg(1)         | [1-X,-Y,1-Z]         | 3.1192       | 98.72          | 3.3873(30)   |
| C(28)-H(28)-> Cg(6)         | [-1+X,Y,Z]           | 3.0856       | 133.26         | 3.7840(31)   |
| C(30)-H(30)-> Cg(5)         | [1/2-X,1/2+Y,1/2-Z]  | 3.1688       | 111.71         | 3.6176(32)   |
| C(37)-H(37)-> Cg(2)         | [1-X,-Y,1-Z]         | 3.0940       | 111.48         | 3.5419(29)   |
| C(43)-H(43C)-> Cg(7)        | [X,-1+Y,Z]           | 2.8751       | 146.39         | 3.7128(36)   |

The Cg(I) refer to the Ring Centre-of-Gravity numbers given in ( ) in the Ring-Analysis above

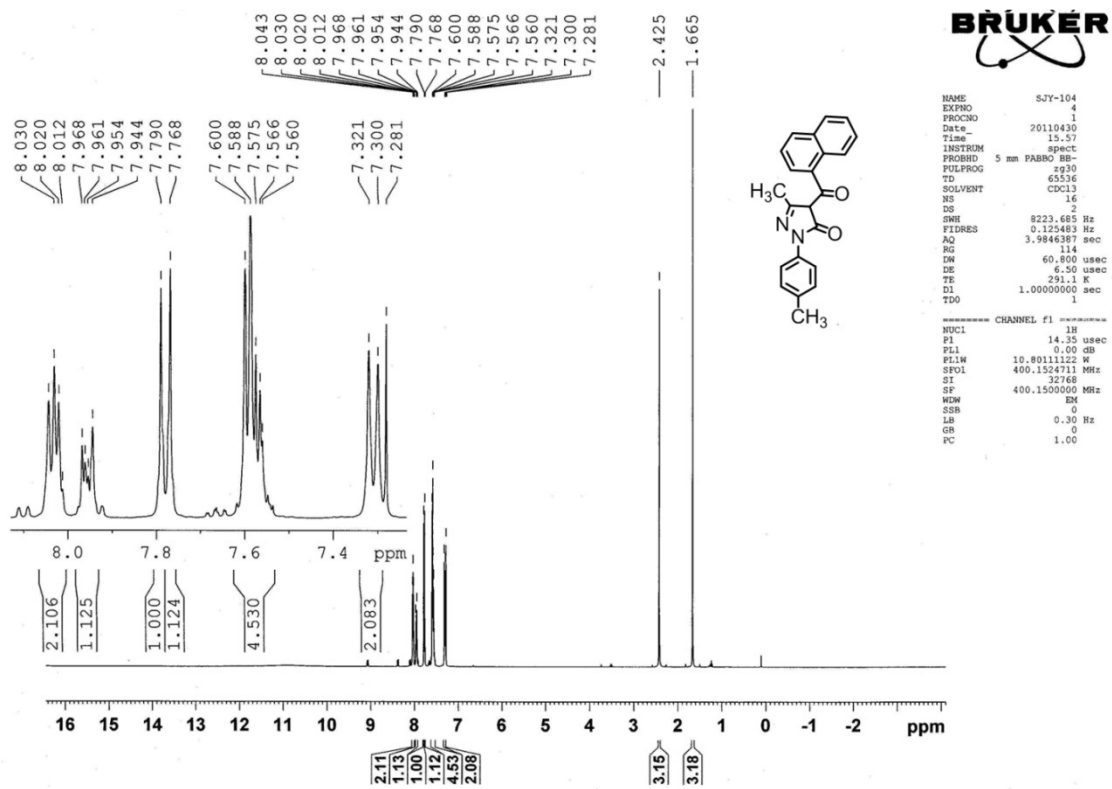

Fig. S1. <sup>1</sup>H NMR spectrum of L2

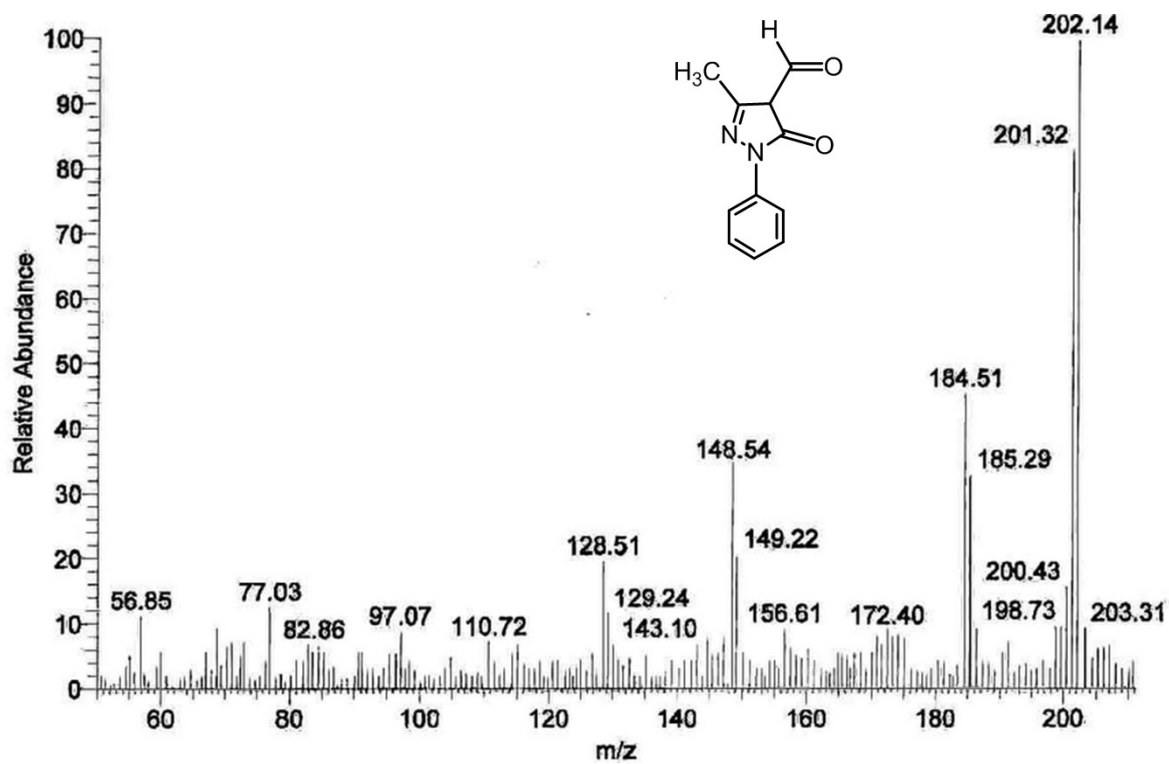

Fig. S2. Mass spectrum of L1

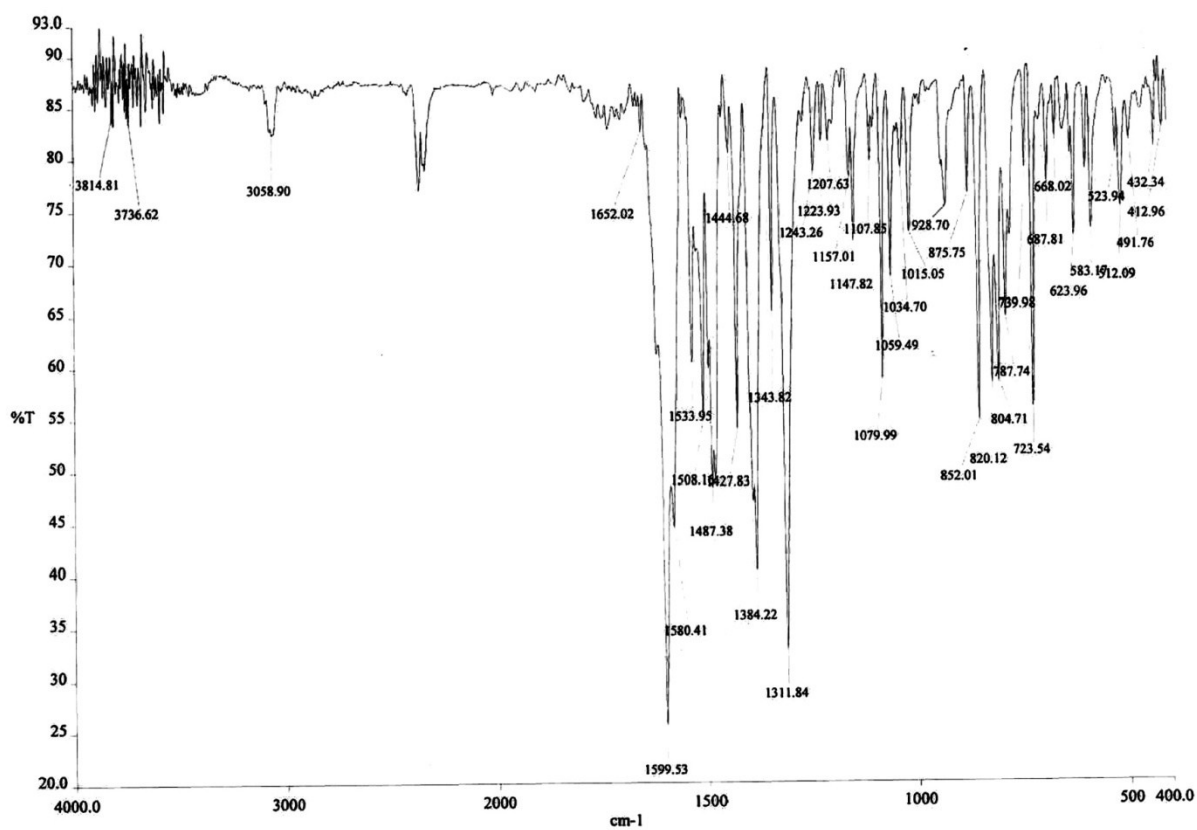

Fig. S3. FTIR spectrum of Complex-3

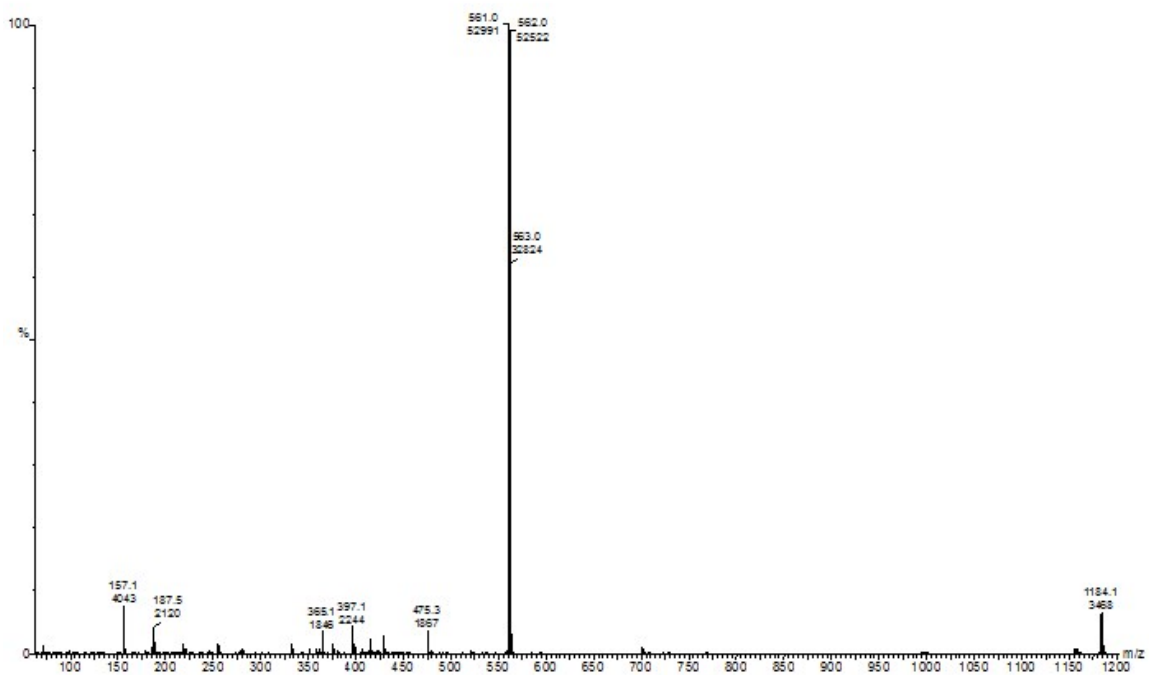

Fig. S4. Mass spectrum of Complex-4

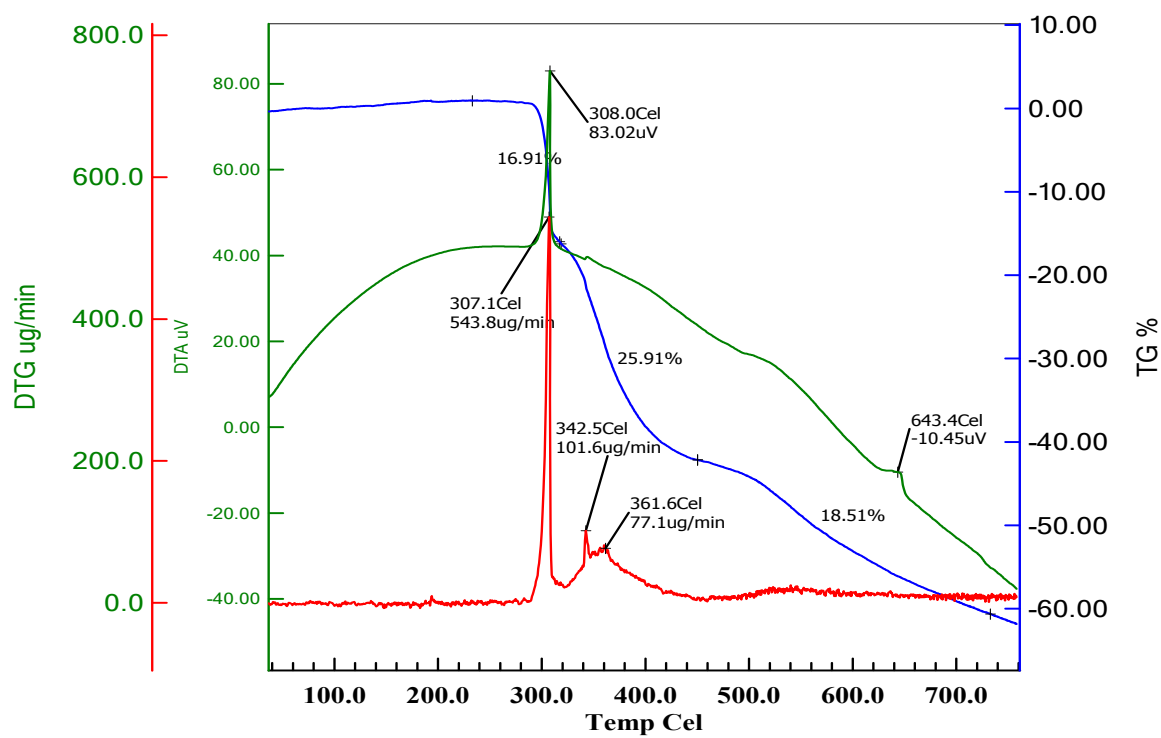

Fig. S5. TGA spectrum of Complex-3
